# Supplementary material for: Sexual behavior shapes male genitourinary microbiome composition
Source: PubMed Central journal article supplement — Cell Rep Med. 2023 Mar 21;4(3):100981. doi: 10.1016/j.xcrm.2023.100981 (PMC10040456; doi:10.1016/j.xcrm.2023.100981), 2023-03-21
Supplement: mmc1.pdf [file mmc1.pdf]

**Cell Reports Medicine, Volume 4**

**Supplemental information**

**Sexual behavior shapes male  
genitourinary microbiome composition**

**Evelyn Toh, Yue Xing, Xiang Gao, Stephen J. Jordan, Teresa A. Batteiger, Byron E. Batteiger, Barbara Van Der Pol, Christina A. Muzny, Netsanet Gebregziabher, James A. Williams, Lora J. Fortenberry, J. Dennis Fortenberry, Qunfeng Dong, and David E. Nelson**

Supplemental Information.

Supplementary Table S1, related to Figure 1. IUMP Study Participant Characteristics (N = 110)

| <b>Characteristics</b>                    | <b>N (%)</b>     |
|-------------------------------------------|------------------|
| <b>Age, median (IQR)</b>                  | 28.7 (24.5–36.8) |
| <b>Race</b>                               |                  |
| Black/African American                    | 38 (35%)         |
| White                                     | 58 (53%)         |
| Other                                     | 14 (13%)         |
| <b>Ethnicity</b>                          |                  |
| Non-Hispanic                              | 98 (89%)         |
| Hispanic                                  | 12 (11%)         |
| <b>Self-reported sexual orientation</b>   |                  |
| Heterosexual                              | 75 (68%)         |
| MSM                                       | 22 (20%)         |
| Other                                     | 13 (12%)         |
| <b>Prior self-reported history of STI</b> |                  |
| Chlamydia (N = 106)                       | 33 (31%)         |
| Gonorrhea (N = 106)                       | 26 (25%)         |
| Trichomoniasis (N = 107)                  | 5 (5%)           |
| Herpes (N = 105)                          | 5 (5%)           |
| Syphilis (N = 105)                        | 5 (5%)           |
| NGU (N = 105)                             | 11 (10%)         |
| Genital warts (N = 107)                   | 7 (7%)           |
| <b>Vaginal sex, most recent</b>           |                  |
| Never                                     | 15 (14%)         |
| Within prior 60 days                      | 71 (65%)         |
| Within prior 1 year                       | 8 (7%)           |
| Lifetime/more than prior 1 year           | 15 (14%)         |
| <b>Received oral sex, most recent</b>     |                  |
| Never                                     | 1 (1%)           |
| Within prior 60 days                      | 90 (82%)         |
| Within prior 1 year                       | 9 (8%)           |
| Lifetime/more than prior 1 year           | 10 (9%)          |
| <b>Insertive anal sex, most recent</b>    |                  |
| Never                                     | 29 (26%)         |
| Within prior 60 days                      | 41 (37%)         |
| Within prior 1 year                       | 13 (12%)         |
| Lifetime/more than prior 1 year           | 27 (25%)         |
| <b>Reason for visit</b>                   |                  |
| Diagnosed with STI                        | 1 (1%)           |
| Genital symptoms                          | 3 (3%)           |
| Worried about STI                         | 21 (19%)         |
| Partner diagnosed with STI                | 5 (5%)           |
| General checkup/other                     | 80 (73%)         |

**Supplementary Table S2, related to Table 1 and STAR Methods:** Temporal Odds Ratios of microorganisms that are significantly associated with vaginal sex at three-time intervals.

| <b>Taxa</b>                             | <b>Time</b> | <b>OR</b> | <b>CI2.5</b> | <b>CI97.5</b> |
|-----------------------------------------|-------------|-----------|--------------|---------------|
| <i>Actinomyces radingae</i>             | Ever        | 0.0779    | 0.0065       | 0.9271        |
| <i>Aerococcus christensenii</i>         | 1yr         | 4.381     | 1.1898       | 16.1309       |
| <i>Aerococcus christensenii</i>         | 60d         | 4.3514    | 1.3508       | 14.017        |
| <i>Atopobium vaginae</i>                | 1yr         | 4.381     | 1.1898       | 16.1309       |
| <i>Atopobium vaginae</i>                | 60d         | 3.1263    | 1.052        | 9.2907        |
| <i>Corynebacterium glucuronolyticum</i> | 1yr         | 0.2714    | 0.0812       | 0.9069        |
| <i>Corynebacterium glucuronolyticum</i> | 60d         | 0.2727    | 0.0808       | 0.92          |
| <i>Cutibacterium acnes</i>              | Ever        | 0.0779    | 0.0065       | 0.9271        |
| <i>Gardnerella vaginalis</i>            | 1yr         | 11.7949   | 3.2129       | 43.3004       |
| <i>Gardnerella vaginalis</i>            | 60d         | 6.971     | 2.4912       | 19.5067       |
| <i>Gardnerella vaginalis</i>            | Ever        | 35.5352   | 2.0476       | 616.6845      |
| <i>Haemophilus parainfluenzae</i>       | Ever        | 0.0965    | 0.0145       | 0.6436        |
| <i>Haemophilus sp. HMSC71H05</i>        | Ever        | 0.0779    | 0.0065       | 0.9271        |
| <i>Lactobacillus iners</i>              | 1yr         | 6.4186    | 1.3916       | 29.6059       |
| <i>Lactobacillus iners</i>              | 60d         | 3.7692    | 1.1648       | 12.1968       |
| <i>Mageeibacillus indolicus</i>         | 60d         | 10.3333   | 1.297        | 82.3244       |
| <i>Prevotella amnii</i>                 | 1yr         | 8.6735    | 1.0906       | 68.978        |
| <i>Prevotella amnii</i>                 | 60d         | 5.4545    | 1.1676       | 25.481        |
| <i>Staphylococcus hominis</i>           | Ever        | 0.0965    | 0.0145       | 0.6436        |
| <i>Streptococcus anginosus group</i>    | 1yr         | 4.1008    | 1.1117       | 15.1272       |
| <i>Ureaplasma parvum</i>                | 60d         | 20.2688   | 1.1671       | 352.0132      |
| <i>Veillonella montpellierensis</i>     | 1yr         | 4.9833    | 1.3574       | 18.2944       |
| <i>Veillonella montpellierensis</i>     | 60d         | 5         | 1.5571       | 16.0554       |

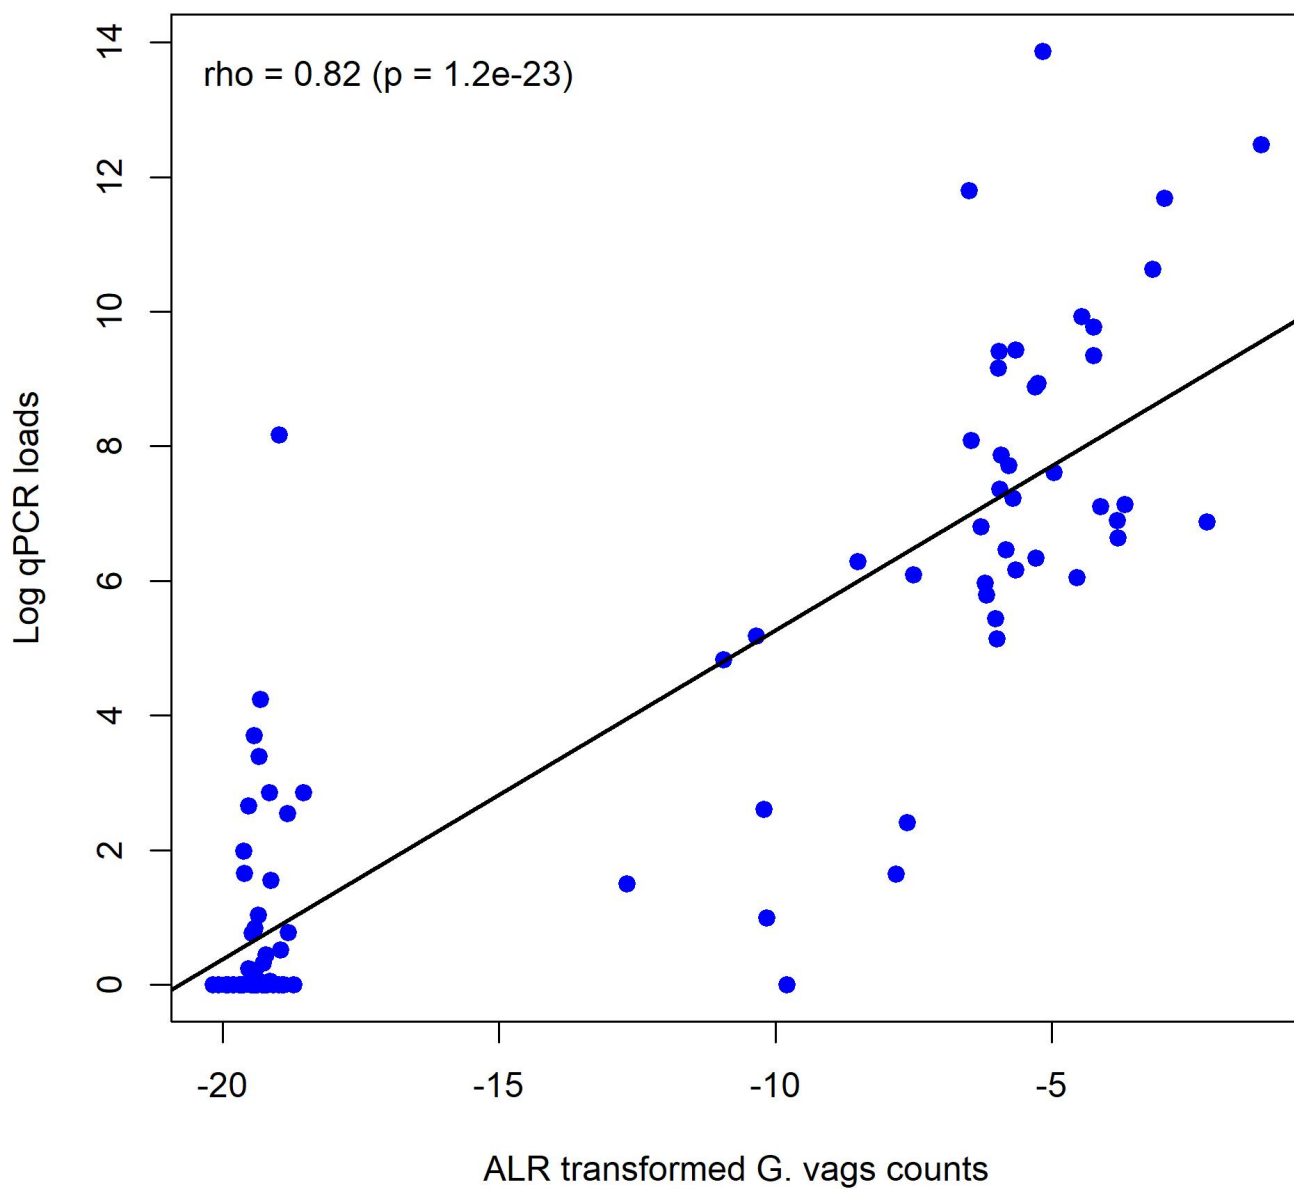

**Supplementary Figure 1, Related to Figure 3 and STAR Methods:** The Spearman's correlation coefficient of *Gardnerella vaginalis* QPCR genome counts and corresponding WGS reads illustrates strong positive correlations, validating the ALR transformation approach.

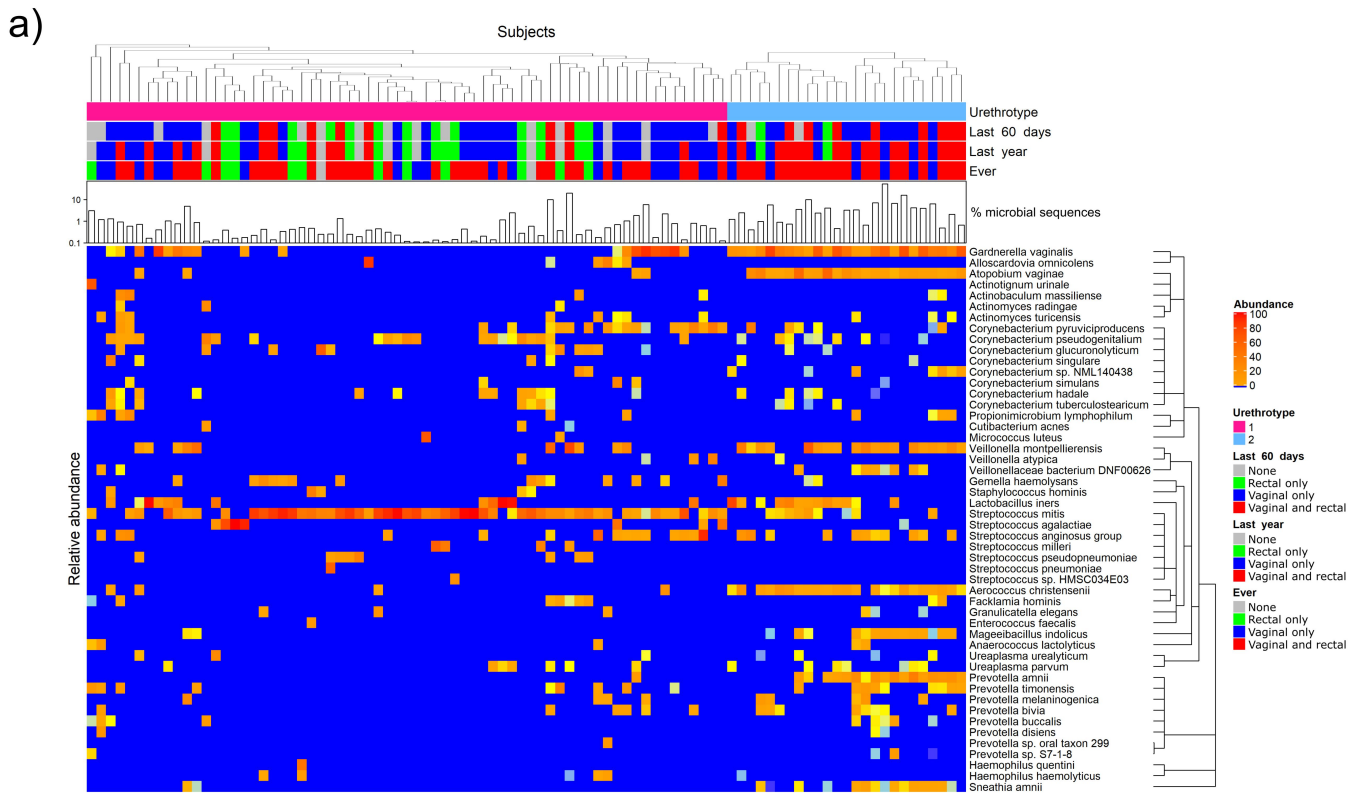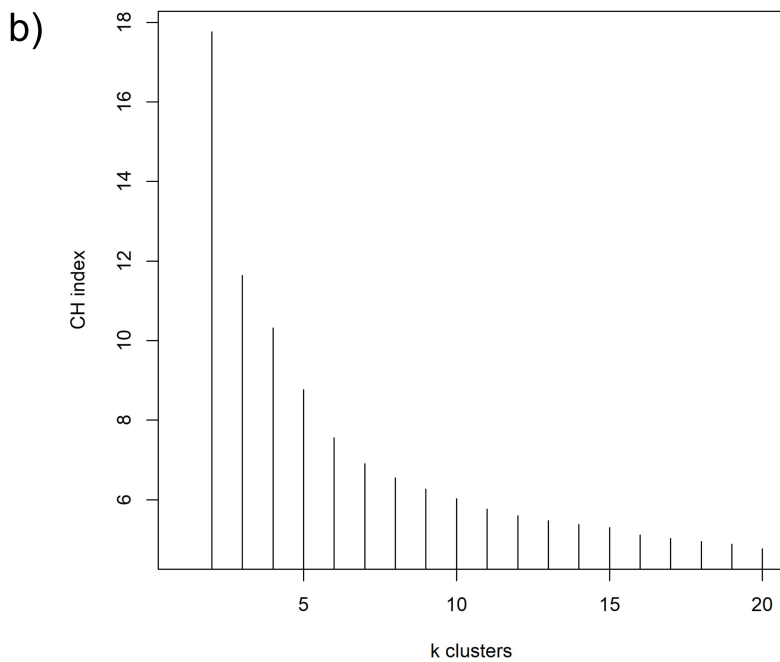

**Supplementary Figure 2, Related to Figure 3 and STAR Methods:** Clustering results based on Euclidian distance using CLR-transformed data reveals two urethrotypes clusters. A) Heatmap of CLR-transformed proportions of the top 50 most abundant microbial taxa found in the PU specimens of 92 participants reveals two UT clusters UT1 and UT2. Metadata at the top of the heat map include type of sexual activity (none, rectal only, vaginal only, vaginal and rectal sex) in specific time intervals (last 60 days, last 1 year, lifetime) and urethrotypes (UT1 = pink, UT2 = blue). The bar graph depicts the absolute abundance of microbial sequences on a log scale. The intensity of the red scale bar correlates with the relative abundance of a given species. Darker red indicates higher relative abundance, B) CH index analysis was used to determine the optimal number of UT clusters.

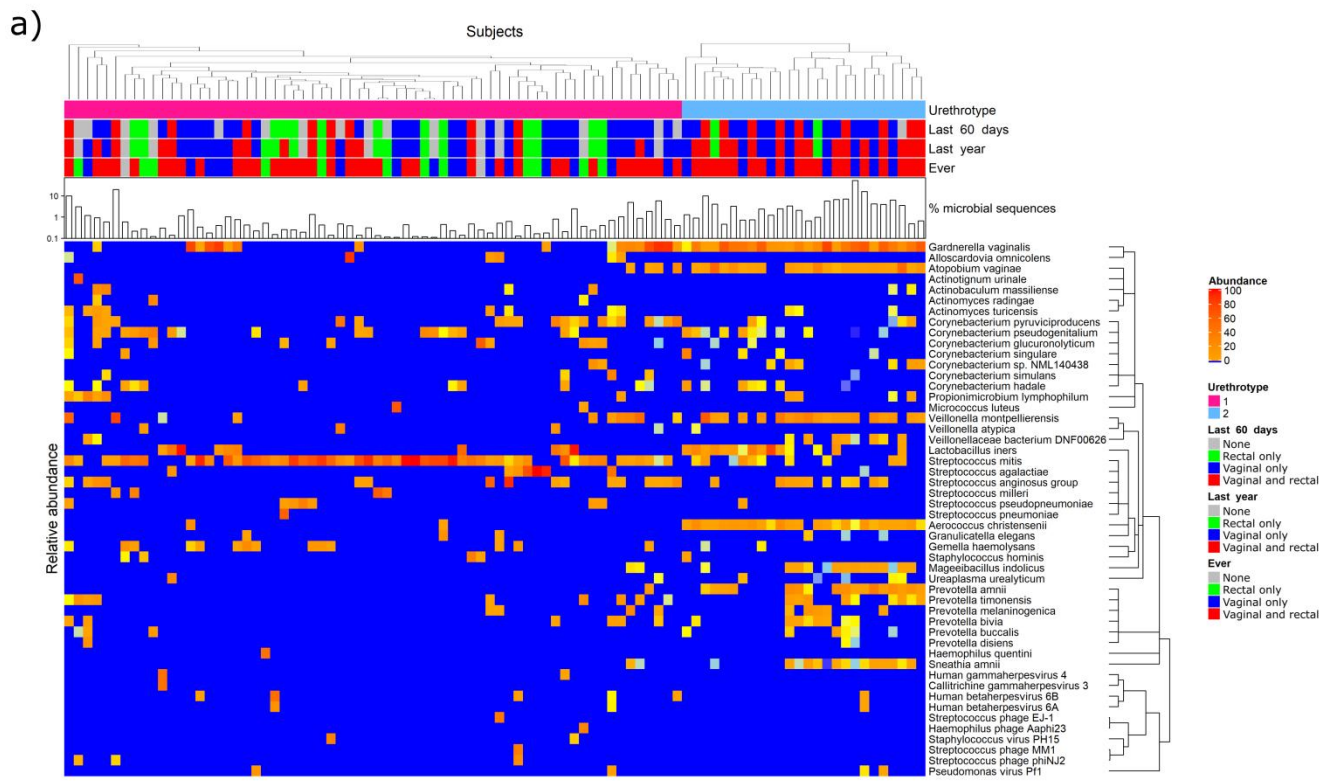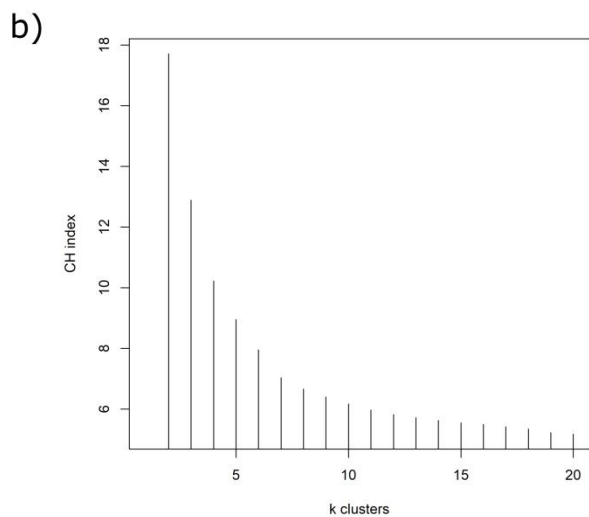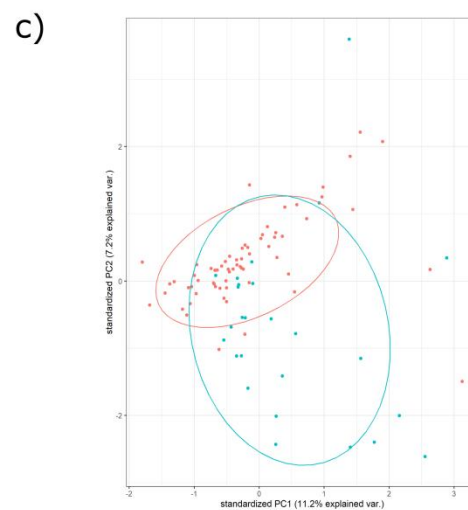

**Supplementary Figure 3, Related to Figure 3 and STAR Methods:** Clustering results based on Euclidian distance using ALR-transformed data reveals two urethrotypes clusters. A) Heatmap of ALR-transformed proportions of the top 50 most abundant microbial taxa found in PU specimens from 92 participants reveals two UT clusters UT1 and UT2. Metadata at the top of the heat map include type of sexual activity (none, rectal only, vaginal only, vaginal and rectal sex) in specific time intervals (last 60 days, last 1 year, lifetime) and urethrotypes (UT1 = pink, UT2 = blue). The bar graph depicts the absolute abundance of microbial sequences on a log scale. The intensity of the red scale bar correlates with the relative abundance of a given species. Darker red indicates higher relative abundance, B) CH index analysis was used to determine the optimal number of UT clusters, C) Relationships among communities visualized by principal component analysis based on bacterial ALR abundance.

**Supplementary Methods S1, Related to Figure 1 and STAR Methods:** Complete IUMP participant study survey.

# Clinical History- Research Nurse

---

Record ID

[To AVOID DUPLICATES ALWAYS FIRST CHECK the Report 'Participant Identifiers And Time Point (Baseline/Followup)' ]

(ALWAYS FIRST CHECK the Report 'Participant Identifiers And Time Point (Baseline/Followup)' )

---

Visit

- Baseline  
 Follow up  
 Second Follow up
- 

Data Form being filled by

- 
- 

Please specify other not listed

\_\_\_\_\_

---

Is this participant a case or control?

- Case  
 Control
- 

Visit Date

\_\_\_\_\_  
(MM/DD/YYYY)

---

1. Are you having eye symptoms?

- No  
 Yes
- 

2. If yes, what eye symptoms are you having?

- Erythema  
 Pain, please describe:  
 Blurry vision  
 Increased tearing  
 Discharge, please describe:  
 Other, please describe:
- 

2a. Please describe pain

\_\_\_\_\_

---



---

2b. Please describe discharge

---

---

2c. Please specify other not listed

---

---

3. Are you having throat symptoms?

- No
- Yes

---

4. If yes, what throat symptoms are you having?

- Sore throat
- Erythema
- Difficulties swallowing
- Swollen tonsils
- Exudate
- Other, please describe:

---

4a. Please specify other not listed

---

---

5. Are you having any abdominal symptoms?

- No
- Yes

---

6. If yes, what abdominal symptoms are you having?

- Abdominal pain, describe (location and characteristics of the pain):
- Diarrhea
- Bloody stools
- Nausea
- Vomiting
- Other, please describe

---

6a. Please specify other not listed

---

---

6b. Please describe location of abdominal pain

---

---

6c. Please describe characteristics of the abdominal pain

---

---

7. Are you having penile/urethral symptoms?

- No  
 Yes

---

8. If yes, what penile/urethral symptoms are you having?

- Burning or tingling  
 Itching  
 Dysuria (pain when you pee)  
 Erythema around meatus  
 Discharge  
 Lesions  
 Other, please describe

---

8a. Please specify number of Lesions

- 1 - 5  
 6 - 10  
 >10

---

8b. Please specify other not listed

\_\_\_\_\_

---

9. Are you having scrotal/testicular symptoms?

- No  
 Yes

---

10. If yes, what scrotal/testicular symptoms are you having?

- Pain  
 Lesions  
 'Bumps' or masses, describe (right or left or both sides, painful vs not painful):  
 Swelling, describe (right or left or both sides):  
 Other, please describe

---

10a. Please specify other not listed

\_\_\_\_\_

---

10b. Please describe side of 'Bumps' or masses

- Right side  
 Left side  
 Both right and left side

---

10c. Please describe pain of 'Bumps' or masses

- Painful  
 Not painful

---

10d. Please indicate where swelling

- Right side  
 Left side  
 Both right and left side

---

11. Are you having anal/rectal/butt symptoms?

- No  
 Yes

---

12. If yes, what anal/butt symptoms are you having?

- Discharge  
 Bleeding  
 Pain, describe (all the time, with defecation, etc):  
 Other, please describe

---

12a. Please specify other not listed

---

---

12b. Please describe the pain

- All the time  
 With defecation  
 Other

---

12b. Please describe the pain other not described above

---

---

13. Are you having any problems with your skin?

- No  
 Yes

---

14. If yes, what problems with your skin are you having?

- Rash, please describe (time frame ongoing):  
 Dryness  
 Pruritis  
 Other, please describe

---

14a. Please specify other not listed

---

---

14b. Please indicate start date of rash

---

(MM/DD/YYYY)

---

14c. Did the rash stop or is it ongoing?

- Rash stopped
- Rash ongoing

---

14d. Please indicate stop date of rash

---

(MM/DD/YYYY)

# Clinical Examination - Research Nurse

Visit

- Baseline
- Follow up

Data Form being filled by

- 
- 
- 
- 
- 
- 
- 

Please specify other reason not listed

\_\_\_\_\_

Visit Date

\_\_\_\_\_

(MM/DD/YYYY)

Eyes:

- WNL
- Conjunctival injection (right, left, bilateral)
- Tearing (right, left, bilateral)
- Discharge (right, left, bilateral; color, quantity)
- Other findings (please describe):

Eyes:Conjunctival injection

- right
- left
- bilateral

Eyes:Tearing

- right
- left
- bilateral

Eyes:Discharge

- right
- left
- bilateral

Eyes: Discharge color

- Watery/clear
- Purulent
- Other

---

Please specify other not listed

---

---

Eyes: Discharge quantity

- Small
- Moderate
- Copious

---

Eyes: Please describe other not listed

---

---

Oropharynx:

- WNL
- Erythema
- Ulceration
- Exudates
- Lesions
- Other findings (please describe):

---

Please describe other oropharynx not listed

---

---

Pubic hair:

- WNL
- Nits
- Other, please describe

---

Pubic hair WNL:

- Normal
- Shaved
- Waxed

---

Pubic hair Nits:

- No
- Yes

---

Pubic Hair: Please describe other not listed

---

---

Penis:

- WNL
- Discharge
- Meatal erythema
- Lesions
- Other, please describe

---

Penis: WNL

- Circumcised
- Uncircumcised

---

Penis: Discharge

- None
- Minimal (with stripping only)
- Moderate
- Copious
- Clear
- Yellow/green
- White

---

Penis: Discharge

- None
- Minimal (with stripping only)
- Small
- Moderate
- Copious

---

Penis: Discharge Color

- Clear
- Yellow/green
- White

---

Penis: Meatal erythema

- No
- Yes

---

Penis: Lesions

- None
- Ulceration
- Genital warts
- Erythema
- Edema
- Other (describe):

---

Penis: Please specify other for lesions not described above

\_\_\_\_\_

---

Penis: Please specify other for not described above

\_\_\_\_\_

---

Penis: Location of lesions

- Peri-meatal
- Shaft
- Scrotum
- Suprapubic area
- Inguinal region
- N/A

---

Penis: Number of lesions

- 1 - 5
- 6 - 10
- >10

---

Scrotum and contents:

- WNL
- Epididymal tenderness
- Testicular tenderness
- Testicular mass
- Swelling
- Other, please describe

---

Scrotum and contents:Epididymal tenderness

- Right
- Left
- Bilateral
- None

---

Scrotum and contents:Testicular tenderness

- Right
- Left
- Bilateral
- None

---

Scrotum and contents:Testicular mass

- Right
- Left
- Bilateral
- None

---

Scrotum and contents:Swelling

- Right
- Left
- Bilateral
- None

---

Scrotum and contents: Please list other not listed above

---



---

External rectal exam:

- WNL
- Discharge, describe (color, quantity):
- Erythema
- Lesion

---

External rectal exam: Discharge Color

- watery/clear
- mucoid
- purulent

---

External rectal exam: Discharge Color

- small
- moderate
- copious

---

External rectal exam: Lesion

- None
- Ulceration (describe)
- Warts (describe)
- External hemorrhoid

---

External rectal exam: Number of Lesion

- 1 - 5
- 6 - 10
- >10

---

Skin:

- WNL
- Rash, describe:
- Erythema
- Other, please describe

---

Skin: Please describe other not listed

\_\_\_\_\_

---

Inguinal Lymph Nodes:

- WNL (not palpable)
- Nodes felt (describe size, tenderness)
- Other, please describe

---

Inguinal Lymph Nodes: describe size

\_\_\_\_\_

---

Inguinal Lymph Nodes: Tenderness

- No  
 Yes

---

Inguinal Lymph Nodes: Please describe other not listed

---

---

Bell Flower Urethral swab Gram Stain results

- None recorded  
 < 2 WBCs, no GNID.  
 2-4 WBCs, no GNID.  
 < 5 WBCs, no GNID.  
 >5 WBCs, no GNID.  
 >5 WBCs, positive for GNID.

---

Bell Flower Results

- Positive  
 Negative  
 Indeterminate

---

Study Samples Obtained:Remainder swab from initial urethral swab for Gram's stain

- No  
 Yes

---

Study Samples Obtained:Urethral swab for Microbiome

- No  
 Yes

---

Study Samples Obtained: First catch urine after swabs obtained

- No  
 Yes

---

Study Samples Obtained: Saliva sample in collection kit (if subject consented)

- No  
 Yes

---

Study Samples Obtained: rectal swab (if subject consented)

- No  
 Yes

---

If yes rectal swab obtained, who obtained it?

- Participant obtained  
 Clinician obtained

---

Treatment Provided

- Azithromycin 1000 mg orally directly observed in clinic
- Doxycycline 100 mg bid orally for 7 days
- Metronidazole 2 g orally directly observed in clinic
- None (controls)
- Other (specify):

---

Please specify other not listed

\_\_\_\_\_

---

Date and Time for Follow Up Appointment (cases only)

\_\_\_\_\_

(MM/DD/YYYY)

# Enrollment Questionnaire Cases and Controls

Please complete the survey below.

Thank you!

---

1. Date of Visit

\_\_\_\_\_  
(MM/DD/YYYY)

---

2. How old are you?

\_\_\_\_\_  
(in years)

---

3. What is your birthdate?

\_\_\_\_\_  
(MM/DD/YYYY)

---

4. What is your race?

- American Indian or Alaskan Native
- Asian
- Black or African American
- Native Hawaiian or other Pacific Islander
- White
- More than one race
- Other

---

4a. Please specify other

\_\_\_\_\_

---

5. This is about Hispanic ethnicity. Are you of Spanish, Hispanic, or Latino descent?

- No, I am not
- Yes, Mexican, Mexican-American Chicano
- Yes, Puerto Rican
- Yes, Cuban
- Yes, Central American
- Yes, South American
- Yes, Caribbean
- Yes, Other Spanish/Hispanic/Latino

---

6a. Which of the following best describes your current relationship status?

- Single and not dating
- Single and dating/hanging out with someone
- In a relationship but not living together
- Living together but not married
- Married and living together
- Married but not living together

---

6b. Is your current dating/relationship partner a:

- Man  
 Woman
- 

7. What is the highest level of education you completed (how much school did you complete)?

- No school or kindergarten  
 1st grade  
 2nd grade  
 3rd grade  
 4th grade  
 5th grade  
 6th grade  
 7th grade  
 8th grade  
 9th grade  
 10th grade  
 11th grade  
 12th grade/High school diploma/GED  
 Vocational school (i.e. technical/secretarial/business)  
 1 year of college  
 2 years of college  
 3 years of college  
 Graduated from college with a 4year degree  
 At least some graduate work  
 Completed a graduate degree
- 

8. Are you currently a student?

- No  
 Yes
- 

9. Do you currently have a job?

- No  
 Yes
- 

10. What is the ZIP code of the area where you currently live?

\_\_\_\_\_

---

11. What is the main reason you came to the clinic today?

[Please select the one answer on the list below that comes closest to your main reason for coming]

- I am having genital symptoms (discharge from my penis, frequent or painful urination; burning/stinging/tingling/itching of the opening of my penis)  
 I am worried that I might have a sexually transmitted infection  
 I am a sexual partner of a person who has been diagnosed with a sexually transmitted infection  
 I had a sexually transmitted infection and the doctor asked me to come back to be checked or treated  
 I am here for a routine check to be tested for a sexually transmitted infection  
 I need a general check-up-and physical exam  
 Other [please describe]
- 

11a. Please specify other

\_\_\_\_\_

---

12. Are there other reasons you came today?

---

|                                                                                                                                                          | No                    | Yes                   |
|----------------------------------------------------------------------------------------------------------------------------------------------------------|-----------------------|-----------------------|
| 12a. I am having genital symptoms (discharge from my penis, frequent or painful urination; burning/stinging/tingling/itching of the opening of my penis) | <input type="radio"/> | <input type="radio"/> |
| 12b. I am worried that I might have a sexually transmitted infection                                                                                     | <input type="radio"/> | <input type="radio"/> |
| 12c. I am a sexual partner of a person who has been diagnosed with a sexually transmitted infection                                                      | <input type="radio"/> | <input type="radio"/> |
| 12d. I had a sexually transmitted infection and the doctor asked me to come back to be checked or treated                                                | <input type="radio"/> | <input type="radio"/> |
| 12e. I am here for a routine check to be tested for a sexually transmitted infection                                                                     | <input type="radio"/> | <input type="radio"/> |
| 12f. I need a general check-up and physical exam                                                                                                         | <input type="radio"/> | <input type="radio"/> |
| 12g. Other [please describe]                                                                                                                             | <input type="radio"/> | <input type="radio"/> |

---

12g. Please specify other

---



---

13. If you are having genital symptoms today, when did you first notice that something was wrong?

- Three days ago or less  
 Four to seven days ago (more than 3 days but up to a week)  
 Seven to fourteen days (1-2 weeks)  
 More than fourteen days ago (2 weeks or more)  
 Don't remember
- 

14. Have you ever smoked cigarettes?

- No  
 Yes
- 

14a. How many years did you smoke cigarettes?

---

(years)

---

14b. Do you currently smoke cigarettes?

- No  
 Yes
- 

14c. How many packs per day?

---

(per day)

---

15. Have you ever consumed alcohol?

- No  
 Yes
- 

15a. Do you currently drink alcohol?

- No  
 Yes
- 

15b. On average, how often do you have drinks containing alcohol? One drink equals 1 bottle/glass of beer, 1 glass of wine, or 1 shot of liquor.

- Never  
 Monthly or less  
 2-4 times a month  
 2-3 times a week  
 4 or more times a week  
 Don't know  
 Would prefer not to answer
- 

15c. If you no longer drink alcohol, when did you quit drinking alcohol?

---

16. Have you used any of the following substances in the past 30 days?

|                                    | No                    | Yes                   |
|------------------------------------|-----------------------|-----------------------|
| 16a. Marijuana                     | <input type="radio"/> | <input type="radio"/> |
| 16b. Methamphetamine               | <input type="radio"/> | <input type="radio"/> |
| 16c. Cocaine                       | <input type="radio"/> | <input type="radio"/> |
| 16d. Crack                         | <input type="radio"/> | <input type="radio"/> |
| 16e. Heroin                        | <input type="radio"/> | <input type="radio"/> |
| 16f. PCP                           | <input type="radio"/> | <input type="radio"/> |
| 16g. Prescription pain medications | <input type="radio"/> | <input type="radio"/> |
| 16h. Other                         | <input type="radio"/> | <input type="radio"/> |

---

16g. Please specify other not listed above

---

---

17. Whether you wanted to or not, how old were you when you engaged in sexual activity with another person for the first time?

---

(in years)

---

17a. Any comments concerning question '17. Whether you wanted to or not, how old were you when you engaged in sexual activity with another person for the first time?'

---

18. How many sex partners have you had in your whole life?

(if unknown enter 999)

---

19. How many sex partners have you had in the past 12 months?

(if unknown enter 999)

---

20. How many sex partners have you had in the past 2 months (60 days)?

(if unknown enter 999)

---

21. How many new sex partners have you had in the past 2 months (60 days)?

(if unknown enter 999)

---

22. Have you ever been treated for a sexually transmitted disease (STD), which is also known as a venereal disease (VD)?

- No  
 Yes  
 Don't know
- 

23. If you have been treated for a sexually transmitted disease or STD, was this within the last 2 months (60 days)?

- No  
 Yes  
 Don't know
- 

Have you ever been told by a doctor or nurse that you had:



|                                      | No                    | Yes                   |
|--------------------------------------|-----------------------|-----------------------|
| 24a. Chlamydia                       | <input type="radio"/> | <input type="radio"/> |
| 24b. Gonorrhea                       | <input type="radio"/> | <input type="radio"/> |
| 24c. Trichomonas                     | <input type="radio"/> | <input type="radio"/> |
| 24d. Herpes                          | <input type="radio"/> | <input type="radio"/> |
| 24e. Syphilis                        | <input type="radio"/> | <input type="radio"/> |
| 24f. NGU (non-gonococcal urethritis) | <input type="radio"/> | <input type="radio"/> |
| 24g. Genital warts                   | <input type="radio"/> | <input type="radio"/> |

How recently have you engaged in the following sexual behaviors with a female partner?

|                                                                                              | Done in past 60 days<br>(two months) | Done in past year     | Done during my<br>lifetime (more than a<br>year ago) | Never done this       |
|----------------------------------------------------------------------------------------------|--------------------------------------|-----------------------|------------------------------------------------------|-----------------------|
| 25a) Masturbated with a woman                                                                | <input type="radio"/>                | <input type="radio"/> | <input type="radio"/>                                | <input type="radio"/> |
| 25b. I put my mouth on a woman's vagina, vulva, genitals ("giving oral sex")                 | <input type="radio"/>                | <input type="radio"/> | <input type="radio"/>                                | <input type="radio"/> |
| 25c. A woman put her mouth on my penis, genitals ("receiving oral sex")                      | <input type="radio"/>                | <input type="radio"/> | <input type="radio"/>                                | <input type="radio"/> |
| 25d. I used a condom while receiving oral sex from a woman                                   | <input type="radio"/>                | <input type="radio"/> | <input type="radio"/>                                | <input type="radio"/> |
| 25e. I put my penis in a woman's vagina ("penile-vaginal sex")                               | <input type="radio"/>                | <input type="radio"/> | <input type="radio"/>                                | <input type="radio"/> |
| 25f. I used a condom during vaginal sex with a woman                                         | <input type="radio"/>                | <input type="radio"/> | <input type="radio"/>                                | <input type="radio"/> |
| 25g. I put my penis in a woman's anus (butthole) ("anal sex")                                | <input type="radio"/>                | <input type="radio"/> | <input type="radio"/>                                | <input type="radio"/> |
| 25h. I used a condom during anal sex with a woman                                            | <input type="radio"/>                | <input type="radio"/> | <input type="radio"/>                                | <input type="radio"/> |
| 25i. I put my mouth on a woman's anus/butthole? ("oral-anal sex," rimming)                   | <input type="radio"/>                | <input type="radio"/> | <input type="radio"/>                                | <input type="radio"/> |
| 25j. A woman put her mouth on my anus/butthole? ("oral-anal sex," rimming)                   | <input type="radio"/>                | <input type="radio"/> | <input type="radio"/>                                | <input type="radio"/> |
| 25k. Does your partner place her finger into or on your anus/butthole while engaging in sex? | <input type="radio"/>                | <input type="radio"/> | <input type="radio"/>                                | <input type="radio"/> |

25I. Do you or your partner place a sex toy (vibrator, butt plug, anal beads) into or on your anus/butthole while engaging in sex?

26. If you have had penile-vaginal sex, of the last 10 times that you had penile-vaginal sex, how many of those times did you use a condom?

- Every Time (10 out of 10 times)  
 9 out of 10 times  
 8 out of 10 times  
 7 out of 10 times  
 6 out of 10 times  
 5 out of 10 times  
 4 out of 10 times  
 3 out of 10 times  
 2 out of 10 times  
 1 out of 10 times  
 Never (0 out of 10 times)

27. If you have had anal sex, of the last 10 times that you had anal sex, how many of those times did you use a condom?

- Every Time (10 out of 10 times)  
 9 out of 10 times  
 8 out of 10 times  
 7 out of 10 times  
 6 out of 10 times  
 5 out of 10 times  
 4 out of 10 times  
 3 out of 10 times  
 2 out of 10 times  
 1 out of 10 times  
 Never (0 out of 10 times)

28. How recently have you engaged in the following sexual behaviors with a male partner?

|                                                                       | Done in past 60 days<br>(two months) | Done in past year     | Done during my<br>lifetime (more than a<br>year ago) | Never done this       |
|-----------------------------------------------------------------------|--------------------------------------|-----------------------|------------------------------------------------------|-----------------------|
| 28a. Masturbated with a man                                           | <input type="radio"/>                | <input type="radio"/> | <input type="radio"/>                                | <input type="radio"/> |
| 28b. I put my mouth on a man's penis, genitals ("giving oral sex")    | <input type="radio"/>                | <input type="radio"/> | <input type="radio"/>                                | <input type="radio"/> |
| 28c. A man put his mouth on my penis, genitals ("receiving oral sex") | <input type="radio"/>                | <input type="radio"/> | <input type="radio"/>                                | <input type="radio"/> |
| 28d. I used a condom during oral sex with a man                       | <input type="radio"/>                | <input type="radio"/> | <input type="radio"/>                                | <input type="radio"/> |
| 28e. I put my penis in a man's anus (butthole) ("insertive anal sex") | <input type="radio"/>                | <input type="radio"/> | <input type="radio"/>                                | <input type="radio"/> |

- |                                                                                                                                           |                       |                       |                       |                       |
|-------------------------------------------------------------------------------------------------------------------------------------------|-----------------------|-----------------------|-----------------------|-----------------------|
| 28f. I used a condom during insertive anal sex with a man                                                                                 | <input type="radio"/> | <input type="radio"/> | <input type="radio"/> | <input type="radio"/> |
| 28g. A man put his penis in a my anus (butthole) ("receptive anal sex")                                                                   | <input type="radio"/> | <input type="radio"/> | <input type="radio"/> | <input type="radio"/> |
| 28h. I used a condom during receptive anal sex with a man                                                                                 | <input type="radio"/> | <input type="radio"/> | <input type="radio"/> | <input type="radio"/> |
| 28i. I put my mouth on a man's anus/butthole? ("oral-anal sex," rimming)                                                                  | <input type="radio"/> | <input type="radio"/> | <input type="radio"/> | <input type="radio"/> |
| 28j. A man put his mouth on my anus/butthole? ("oral-anal sex," rimming)                                                                  | <input type="radio"/> | <input type="radio"/> | <input type="radio"/> | <input type="radio"/> |
| 28k. I used pre-exposure prophylaxis (PrEP) (routine medication to prevent HIV infection, taken daily)                                    | <input type="radio"/> | <input type="radio"/> | <input type="radio"/> | <input type="radio"/> |
| 28l. I used post-exposure prophylaxis (PEP) (temporary medication to prevent HIV infection, taken after I might have been exposed to HIV) | <input type="radio"/> | <input type="radio"/> | <input type="radio"/> | <input type="radio"/> |
| 28m. Does your partner place his finger into or on your anus/butthole while engaging in sex?                                              | <input type="radio"/> | <input type="radio"/> | <input type="radio"/> | <input type="radio"/> |
| 28n. Do you or your partner place a sex toy (vibrator, butt plug, anal beads) into or on your anus/butthole while engaging in sex?        | <input type="radio"/> | <input type="radio"/> | <input type="radio"/> | <input type="radio"/> |

---

29. If you have insertive anal sex with a man, of the last 10 times that you put your penis in a man's anus/butthole, how many of those times did you use a condom?

- Every Time (10 out of 10 times)
- 9 out of 10 times
- 8 out of 10 times
- 7 out of 10 times
- 6 out of 10 times
- 5 out of 10 times
- 4 out of 10 times
- 3 out of 10 times
- 2 out of 10 times
- 1 out of 10 times
- Never (0 out of 10 times)

---

30. If you have receptive anal sex, of the last 10 times that a man put his penis in my anus/butthole, how many of those times did you use a condom?

- Every Time (10 out of 10 times)
- 9 out of 10 times
- 8 out of 10 times
- 7 out of 10 times
- 6 out of 10 times
- 5 out of 10 times
- 4 out of 10 times
- 3 out of 10 times
- 2 out of 10 times
- 1 out of 10 times
- Never (0 out of 10 times)

---

**You are almost done. These are the last few questions.**

---

31. Do you or your partner(s) use any products (i.e. lubricants, spermicides) when you have sex?

- No
- Yes

---

31a. What types of products do you use when you have sex (check all that apply)?

- None
- Saliva
- Lubricants (like KY jelly)
- Spermicide (not related to the condom)
- Oils
- Lotion
- Other, please list:

---

31a. Please specify other not listed

---

\_\_\_\_\_

---

32. Do you masturbate?

- No
- Yes

---

32a. How many times per week?

- None
- 1 time
- 2-3 times
- 4-6 times
- Every day
- 2 or more times a day

---

32b. Do you use lubrication when you masturbate?

- No
- Yes

---

32c. What do you use for lubrication when you masturbate? (check all that apply)

- Nothing
- Saliva
- Store bought lubrication (like KY jelly)
- Lotion
- Oil
- Other: please list:

---

32c. Please specify other

\_\_\_\_\_

---

32d. Do you use a masturbation sleeve or a "Fifi" when you masturbate?

- No
- Yes

---

32e. Do you use any other aids/toys when you masturbate (i.e. vibrator, anal beads)?

- No
- Yes

---

33. Which of the following commonly used terms best describes your sexual orientation?

- Straight/heterosexual (not gay)
- Gay or homosexual
- Bisexual
- Asexual (I am not sexually attracted to others)
- Other, please describe

---

33a. Please specify other

\_\_\_\_\_

# Insight Test Results - Research Nurse

---

Date Form Filled out

- 
- 
- 
- 
- 
- 
- 

---

Please specify other not listed

---

---

Date Form Filled out

---

(MM/DD/YYYY)

---

1. Chlamydia tests (NAAT)

- None recorded
- Negative test(s), date(s):
- Positive test(s), date(s):

---

1a. Chlamydia tests (NAAT): Date of Negative Test

---

(MM/DD/YYYY)

---

1a. Chlamydia tests (NAAT): Date of Negative Test

---

(MM/DD/YYYY)

---

1a. Chlamydia tests (NAAT): Date of Negative Test

---

(MM/DD/YYYY)

---

1a. Chlamydia tests (NAAT): Date of Negative Test

---

(MM/DD/YYYY)

---

1a. Chlamydia tests (NAAT): Date of Negative Test

---

(MM/DD/YYYY)

---

1a. Chlamydia tests (NAAT): Date of Negative Test

---

(MM/DD/YYYY)

---

1a. Chlamydia tests (NAAT): Date of Negative Test

---

(MM/DD/YYYY)

---

1a. Chlamydia tests (NAAT): Date of Negative Test

---

(MM/DD/YYYY)

---

1a. Chlamydia tests (NAAT): Date of Negative Test

---

(MM/DD/YYYY)

---

1a. Chlamydia tests (NAAT): Date of Negative Test

---

(MM/DD/YYYY)

---

1b. Chlamydia tests (NAAT): Date of Positive Test

---

(MM/DD/YYYY)

---

1b. Chlamydia tests (NAAT): Date of Positive Test

---

(MM/DD/YYYY)

---

1b. Chlamydia tests (NAAT): Date of Positive Test

---

(MM/DD/YYYY)

---

1b. Chlamydia tests (NAAT): Date of Positive Test

---

(MM/DD/YYYY)

---

1b. Chlamydia tests (NAAT): Date of Positive Test

---

(MM/DD/YYYY)

---

1b. Chlamydia tests (NAAT): Date of Positive Test

\_\_\_\_\_

(MM/DD/YYYY)

---

1b. Chlamydia tests (NAAT): Date of Positive Test

\_\_\_\_\_

(MM/DD/YYYY)

---

1b. Chlamydia tests (NAAT): Date of Positive Test

\_\_\_\_\_

(MM/DD/YYYY)

---

1b. Chlamydia tests (NAAT): Date of Positive Test

\_\_\_\_\_

(MM/DD/YYYY)

---

1b. Chlamydia tests (NAAT): Date of Positive Test

\_\_\_\_\_

(MM/DD/YYYY)

---

2. Gonorrhea tests (NAAT or culture)

- None recorded
- Negative test(s), date(s):
- Positive test(s), date(s):

---

2a. Gonorrhea tests (NAAT or culture): Date of Negative Test

\_\_\_\_\_

(MM/DD/YYYY)

---

2a. Gonorrhea tests (NAAT or culture): Date of Negative Test

\_\_\_\_\_

(MM/DD/YYYY)

---

2a. Gonorrhea tests (NAAT or culture): Date of Negative Test

\_\_\_\_\_

(MM/DD/YYYY)

---

2a. Gonorrhea tests (NAAT or culture): Date of Negative Test

\_\_\_\_\_

(MM/DD/YYYY)



---

2a. Gonorrhea tests (NAAT or culture): Date of Negative Test

\_\_\_\_\_

(MM/DD/YYYY)

---

2a. Gonorrhea tests (NAAT or culture): Date of Negative Test

\_\_\_\_\_

(MM/DD/YYYY)

---

2a. Gonorrhea tests (NAAT or culture): Date of Negative Test

\_\_\_\_\_

(MM/DD/YYYY)

---

2a. Gonorrhea tests (NAAT or culture): Date of Negative Test

\_\_\_\_\_

(MM/DD/YYYY)

---

2a. Gonorrhea tests (NAAT or culture): Date of Negative Test

\_\_\_\_\_

(MM/DD/YYYY)

---

2a. Gonorrhea tests (NAAT or culture): Date of Negative Test

\_\_\_\_\_

(MM/DD/YYYY)

---

2a. Gonorrhea tests (NAAT or culture): Date of Negative Test

\_\_\_\_\_

(MM/DD/YYYY)

---

2b. Gonorrhea tests (NAAT or culture): Date of Positive Test

\_\_\_\_\_

(MM/DD/YYYY)

---

2b. Gonorrhea tests (NAAT or culture): Date of Positive Test

\_\_\_\_\_

(MM/DD/YYYY)

---

2b. Gonorrhea tests (NAAT or culture): Date of Positive Test

\_\_\_\_\_

(MM/DD/YYYY)

---

2b. Gonorrhea tests (NAAT or culture): Date of Positive Test

\_\_\_\_\_  
(MM/DD/YYYY)

---

2b. Gonorrhea tests (NAAT or culture): Date of Positive Test

\_\_\_\_\_  
(MM/DD/YYYY)

---

2b. Gonorrhea tests (NAAT or culture): Date of Positive Test

\_\_\_\_\_  
(MM/DD/YYYY)

---

2b. Gonorrhea tests (NAAT or culture): Date of Positive Test

\_\_\_\_\_  
(MM/DD/YYYY)

---

2b. Gonorrhea tests (NAAT or culture): Date of Positive Test

\_\_\_\_\_  
(MM/DD/YYYY)

---

2b. Gonorrhea tests (NAAT or culture): Date of Positive Test

\_\_\_\_\_  
(MM/DD/YYYY)

---

3. Trichomonas tests (NAAT)

- None recorded
- Negative test(s), date(s):
- Positive test(s), date(s):

---

3a. Trichomonas tests (NAAT): Date of Negative Test

\_\_\_\_\_  
(MM/DD/YYYY)

---

3a. Trichomonas tests (NAAT): Date of Negative Test

\_\_\_\_\_  
(MM/DD/YYYY)

---

3a. Trichomonas tests (NAAT): Date of Negative Test

\_\_\_\_\_  
(MM/DD/YYYY)

---

3a. Trichomonas tests (NAAT): Date of Negative Test

\_\_\_\_\_

(MM/DD/YYYY)

---

3a. Trichomonas tests (NAAT): Date of Negative Test

\_\_\_\_\_

(MM/DD/YYYY)

---

3a. Trichomonas tests (NAAT): Date of Negative Test

\_\_\_\_\_

(MM/DD/YYYY)

---

3a. Trichomonas tests (NAAT): Date of Negative Test

\_\_\_\_\_

(MM/DD/YYYY)

---

3a. Trichomonas tests (NAAT): Date of Negative Test

\_\_\_\_\_

(MM/DD/YYYY)

---

3a. Trichomonas tests (NAAT): Date of Negative Test

\_\_\_\_\_

(MM/DD/YYYY)

---

3a. Trichomonas tests (NAAT): Date of Negative Test

\_\_\_\_\_

(MM/DD/YYYY)

---

3b. Trichomonas tests (NAAT): Date of Positive Test

\_\_\_\_\_

(MM/DD/YYYY)

---

3b. Trichomonas tests (NAAT): Date of Positive Test

\_\_\_\_\_

(MM/DD/YYYY)

---

3b. Trichomonas tests (NAAT): Date of Positive Test

\_\_\_\_\_

(MM/DD/YYYY)

---

3b. Trichomonas tests (NAAT): Date of Positive Test

\_\_\_\_\_  
(MM/DD/YYYY)

---

3b. Trichomonas tests (NAAT): Date of Positive Test

\_\_\_\_\_  
(MM/DD/YYYY)

---

3b. Trichomonas tests (NAAT): Date of Positive Test

\_\_\_\_\_  
(MM/DD/YYYY)

---

3b. Trichomonas tests (NAAT): Date of Positive Test

\_\_\_\_\_  
(MM/DD/YYYY)

---

3b. Trichomonas tests (NAAT): Date of Positive Test

\_\_\_\_\_  
(MM/DD/YYYY)

---

3b. Trichomonas tests (NAAT): Date of Positive Test

\_\_\_\_\_  
(MM/DD/YYYY)

---

3b. Trichomonas tests (NAAT): Date of Positive Test

\_\_\_\_\_  
(MM/DD/YYYY)

---

4. Gram stain

- None recorded
- < 2 WBCs, no GNID. Date(s):
- 2-4 WBCs, no GNID. Date(s):
- < 5 WBCs, no GNID. Date(s):
- >5 WBCs, no GNID. Date(s):
- >5 WBCs, positive for GNID. Date(s):

---

4a. Gram stain: Date of < 5 WBCs, no GNID

\_\_\_\_\_  
(MM/DD/YYYY)

---

4a. Gram stain: Date of < 5 WBCs, no GNID

\_\_\_\_\_  
(MM/DD/YYYY)

---

4a. Gram stain: Date of < 5 WBCs, no GNID

---

(MM/DD/YYYY)

---

4a. Gram stain: Date of < 5 WBCs, no GNID

---

(MM/DD/YYYY)

---

4a. Gram stain: Date of < 5 WBCs, no GNID

---

(MM/DD/YYYY)

---

4a. Gram stain: Date of < 5 WBCs, no GNID

---

(MM/DD/YYYY)

---

4a. Gram stain: Date of < 5 WBCs, no GNID

---

(MM/DD/YYYY)

---

4a. Gram stain: Date of < 5 WBCs, no GNID

---

(MM/DD/YYYY)

---

4a. Gram stain: Date of < 5 WBCs, no GNID

---

(MM/DD/YYYY)

---

4a. Gram stain: Date of < 5 WBCs, no GNID

---

(MM/DD/YYYY)

---

4b. Gram stain: Date of > 5 WBCs, no GNID

---

(MM/DD/YYYY)

---

4b. Gram stain: Date of > 5 WBCs, no GNID

---

(MM/DD/YYYY)

---

4b. Gram stain: Date of > 5 WBCs, no GNID

\_\_\_\_\_

(MM/DD/YYYY)

---

4b. Gram stain: Date of > 5 WBCs, no GNID

\_\_\_\_\_

(MM/DD/YYYY)

---

4b. Gram stain: Date of > 5 WBCs, no GNID

\_\_\_\_\_

(MM/DD/YYYY)

---

4b. Gram stain: Date of > 5 WBCs, no GNID

\_\_\_\_\_

(MM/DD/YYYY)

---

4b. Gram stain: Date of > 5 WBCs, no GNID

\_\_\_\_\_

(MM/DD/YYYY)

---

4b. Gram stain: Date of > 5 WBCs, no GNID

\_\_\_\_\_

(MM/DD/YYYY)

---

4b. Gram stain: Date of > 5 WBCs, no GNID

\_\_\_\_\_

(MM/DD/YYYY)

---

4b. Gram stain: Date of > 5 WBCs, no GNID

\_\_\_\_\_

(MM/DD/YYYY)

---

4c. Gram stain: Date of > 5 WBCs, positive for GNID

\_\_\_\_\_

(MM/DD/YYYY)

---

4c. Gram stain: Date of > 5 WBCs, positive for GNID

\_\_\_\_\_

(MM/DD/YYYY)

---

4c. Gram stain: Date of > 5 WBCs, positive for GNID

\_\_\_\_\_

(MM/DD/YYYY)

---

4c. Gram stain: Date of > 5 WBCs, positive for GNID

\_\_\_\_\_

(MM/DD/YYYY)

---

4c. Gram stain: Date of > 5 WBCs, positive for GNID

\_\_\_\_\_

(MM/DD/YYYY)

---

4c. Gram stain: Date of > 5 WBCs, positive for GNID

\_\_\_\_\_

(MM/DD/YYYY)

---

4c. Gram stain: Date of > 5 WBCs, positive for GNID

\_\_\_\_\_

(MM/DD/YYYY)

---

4c. Gram stain: Date of > 5 WBCs, positive for GNID

\_\_\_\_\_

(MM/DD/YYYY)

---

4c. Gram stain: Date of > 5 WBCs, positive for GNID

\_\_\_\_\_

(MM/DD/YYYY)

---

4c. Gram stain: Date of > 5 WBCs, positive for GNID

\_\_\_\_\_

(MM/DD/YYYY)

---

4d. Gram stain: Date of < 2 WBCs, no GNID. Date(s):

\_\_\_\_\_

(MM/DD/YYYY)

---

4d. Gram stain: Date of < 2 WBCs, no GNID. Date(s):

\_\_\_\_\_

(MM/DD/YYYY)

---

4d. Gram stain: Date of < 2 WBCs, no GNID. Date(s):

\_\_\_\_\_

(MM/DD/YYYY)

---

4d. Gram stain: Date of < 2 WBCs, no GNID. Date(s):

\_\_\_\_\_

(MM/DD/YYYY)

---

4d. Gram stain: Date of < 2 WBCs, no GNID. Date(s):

\_\_\_\_\_

(MM/DD/YYYY)

---

4d. Gram stain: Date of < 2 WBCs, no GNID. Date(s):

\_\_\_\_\_

(MM/DD/YYYY)

---

4d. Gram stain: Date of < 2 WBCs, no GNID. Date(s):

\_\_\_\_\_

(MM/DD/YYYY)

---

4d. Gram stain: Date of < 2 WBCs, no GNID. Date(s):

\_\_\_\_\_

(MM/DD/YYYY)

---

4d. Gram stain: Date of < 2 WBCs, no GNID. Date(s):

\_\_\_\_\_

(MM/DD/YYYY)

---

4d. Gram stain: Date of < 2 WBCs, no GNID. Date(s):

\_\_\_\_\_

(MM/DD/YYYY)

---

4e. Gram stain: Date of 2-4 WBCs, no GNID. Date(s):

\_\_\_\_\_

(MM/DD/YYYY)

---

4e. Gram stain: Date of 2-4 WBCs, no GNID. Date(s):

\_\_\_\_\_

(MM/DD/YYYY)



---

4e. Gram stain: Date of 2-4 WBCs, no GNID. Date(s):

\_\_\_\_\_

(MM/DD/YYYY)

---

4e. Gram stain: Date of 2-4 WBCs, no GNID. Date(s):

\_\_\_\_\_

(MM/DD/YYYY)

---

4e. Gram stain: Date of 2-4 WBCs, no GNID. Date(s):

\_\_\_\_\_

(MM/DD/YYYY)

---

4e. Gram stain: Date of 2-4 WBCs, no GNID. Date(s):

\_\_\_\_\_

(MM/DD/YYYY)

---

4e. Gram stain: Date of 2-4 WBCs, no GNID. Date(s):

\_\_\_\_\_

(MM/DD/YYYY)

---

4e. Gram stain: Date of 2-4 WBCs, no GNID. Date(s):

\_\_\_\_\_

(MM/DD/YYYY)

---

4e. Gram stain: Date of 2-4 WBCs, no GNID. Date(s):

\_\_\_\_\_

(MM/DD/YYYY)

---

4e. Gram stain: Date of 2-4 WBCs, no GNID. Date(s):

\_\_\_\_\_

(MM/DD/YYYY)

---

5. Prior diagnosis of NGU

- None recorded
- NGU diagnosis, date(s):

---

5a. Date of Prior diagnosis of NGU diagnosis

\_\_\_\_\_

(MM/DD/YYYY)

---

5a. Date of Prior diagnosis of NGU diagnosis

---

(MM/DD/YYYY)

---

5a. Date of Prior diagnosis of NGU diagnosis

---

(MM/DD/YYYY)

---

5a. Date of Prior diagnosis of NGU diagnosis

---

(MM/DD/YYYY)

---

5a. Date of Prior diagnosis of NGU diagnosis

---

(MM/DD/YYYY)

---

5a. Date of Prior diagnosis of NGU diagnosis

---

(MM/DD/YYYY)

---

5a. Date of Prior diagnosis of NGU diagnosis

---

(MM/DD/YYYY)

---

5a. Date of Prior diagnosis of NGU diagnosis

---

(MM/DD/YYYY)

---

5a. Date of Prior diagnosis of NGU diagnosis

---

(MM/DD/YYYY)

---

5a. Date of Prior diagnosis of NGU diagnosis

---

(MM/DD/YYYY)

# Specimen Lab

---

Barcode for U1a/Unspun Urine

\_\_\_\_\_ (U1a)

---

Sample of U1a/Unspun Urine

- Not Collected
- Not Run-Technical Error
- Other

---

Please specify other reason

\_\_\_\_\_

---

Barcode for U1ap/Unspun Urine

\_\_\_\_\_ (U1ap)

---

Sample of U1ap/Unspun Urine

- Not Collected
- Not Run-Technical Error
- Other

---

Please specify other reason

\_\_\_\_\_

---

Barcode for U1an/Unspun Urine

\_\_\_\_\_ (U1an)

---

Sample of U1an/Unspun Urine

- Not Collected
- Not Run-Technical Error
- Other

---

Please specify other reason

\_\_\_\_\_

---

Barcode for U1b/Unspun Urine

\_\_\_\_\_ (U1b)

---

Sample of U1b/Unspun Urine

- Not Collected
- Not Run-Technical Error
- Other

---

Please specify other reason

\_\_\_\_\_

---

Barcode for rs1/Rectal Swab

\_\_\_\_\_ (rs1)

---

Sample of rs1/Rectal Swab

- Not Collected
- Not Run-Technical Error
- Other

---

Please specify other reason

\_\_\_\_\_

Barcode for rs1a/Rectal Swab

\_\_\_\_\_  
(rs1a)

Sample of rs1a/Rectal Swab

- Not Collected  
 Not Run-Technical Error  
 Other

Please specify other reason

\_\_\_\_\_

Date Form Filled Out

\_\_\_\_\_  
(MM/DD/YYYY)

Name of Person filling out Form

- 

Please specify other

\_\_\_\_\_

Collection Date and Time

\_\_\_\_\_  
(Date Time with Seconds (MMDDYYYY H:M:S) )

Date Received in Laboratory

\_\_\_\_\_  
(MMDDYYYY)

Aliquot Date and Time

\_\_\_\_\_  
(Date Time with Seconds (MMDDYYYY H:M:S))

Urine Volume

\_\_\_\_\_  
(ml)

### Urine Test Results

Chlamydia trachomatis

- Positive  
 Negative  
 Indeterminate

Final Chlamydia trachomatis (if originally indeterminate)

- Positive  
 Negative  
 Indeterminate

Biological Categorization of Chlamydia trachomatis (if originally indeterminate)

- Positive  
 Negative  
 Indeterminate

Clinical Categorization of Chlamydia trachomatis (if originally indeterminate)

- Positive  
 Negative  
 Indeterminate

---

Value \_\_\_\_\_

---

Concentration \_\_\_\_\_

---

Organism Load \_\_\_\_\_

---

Comments \_\_\_\_\_

---

Neisseria gonorrhoeae  Positive  
 Negative  
 Indeterminate

---

Final Neisseria gonorrhoeae (if originally indeterminate)  Positive  
 Negative  
 Indeterminate

---

Biological Categorization of Neisseria gonorrhoeae (if originally indeterminate)  Positive  
 Negative  
 Indeterminate

---

Clinical Categorization of Neisseria gonorrhoeae (if originally indeterminate)  Positive  
 Negative  
 Indeterminate

---

Value \_\_\_\_\_

---

Concentration \_\_\_\_\_

---

Comments \_\_\_\_\_

---

Trichomonas vaginalis  Positive  
 Negative  
 Indeterminate

---

Final Trichomonas vaginalis (if originally indeterminate)  Positive  
 Negative  
 Indeterminate

---

Biological Categorization of Trichomonas vaginalis (if originally indeterminate)  Positive  
 Negative  
 Indeterminate

---

Clinical Categorization of Trichomonas vaginalis (if originally indeterminate)  Positive  
 Negative  
 Indeterminate

---

Value \_\_\_\_\_

---

Concentration \_\_\_\_\_

---

Comments \_\_\_\_\_

---

Mycoplasma genitalium  Positive  
 Negative  
 Indeterminate

---

Final Mycoplasma genitalium (if originally indeterminate)  Positive  
 Negative  
 Indeterminate

---

Biological Categorization of Mycoplasma genitalium (if originally indeterminate)  Positive  
 Negative  
 Indeterminate

---

Clinical Catogrization of Mycoplasma genitalium (if originally indeterminate)  Positive  
 Negative  
 Indeterminate

---

Value \_\_\_\_\_

---

Concentration \_\_\_\_\_

---

Comments \_\_\_\_\_

---

Macrolide resistance testing result  Positive  
 Negative  
 Indeterminate

---

Biological Categorization of Macrolide resistance testing result (if original result is indeterminate)  Positive  
 Negative  
 Indeterminate

---

Clinical Categorization of Macrolide resistance testing result (if original result is indeterminate)  Positive  
 Negative  
 Indeterminate

---

Macrolide resistance testing result date \_\_\_\_\_  
(MM/DD/YYYY)

---

Macrolide resistance testing result comments \_\_\_\_\_

---

Quinolone resistance testing result  Positive  
 Negative  
 Indeterminate

Biological Categorization of Quinolone resistance testing result (if original result is indeterminate)

- Positive  
 Negative  
 Indeterminate

Clinical Categorization of Quinolone resistance testing result (if original result is indeterminate)

- Positive  
 Negative  
 Indeterminate

Quinolone resistance testing result date

\_\_\_\_\_  
 (MM/DD/YYYY)

Quinolone resistance testing result comments

Ureaplasma urealyticum

- Positive  
 Negative  
 Indeterminate

Final Ureaplasma urealyticum (if originally indeterminate)

- Positive  
 Negative  
 Indeterminate

Biological Categorization of Ureaplasma urealyticum (if originally indeterminate)

- Positive  
 Negative  
 Indeterminate

Clinical Categorization of Ureaplasma urealyticum (if originally indeterminate)

- Positive  
 Negative  
 Indeterminate

Value

Concentration

Comments

### Urine Specimen Storage

Identifier of Abbott tube

Date Frozen

\_\_\_\_\_  
 (MMDDYYYY)

Freezer Location

Comments

Identifier of Amplicor aliquot

---

Date frozen

---

(MMDDYYYY)

Freezer Location

---

Comments

---

Identifier of Neat Urine

---

Date frozen

---

(MM/DD/YYYY)

Freezer Location

---

Comments

---

### Rectal Test Results

Chlamydia trachomatis

- Positive  
 Negative  
 Indeterminate

Final Chlamydia trachomatis (if originally indeterminate)

- Positive  
 Negative  
 Indeterminate

Value

---

Concentration

---

Comments

---

Mycoplasma genitalium

- Positive  
 Negative  
 Indeterminate

Final Mycoplasma genitalium (if originally indeterminate)

- Positive  
 Negative  
 Indeterminate

Value

---



Concentration \_\_\_\_\_

Comments \_\_\_\_\_

**Rectal Specimen Storage**

Identifier of Abbott Tube \_\_\_\_\_

Date frozen \_\_\_\_\_  
(MM/DD/YYYY)

Freezer Location \_\_\_\_\_

Comments \_\_\_\_\_

Identifier of SPG aliquot \_\_\_\_\_

Date frozen \_\_\_\_\_  
(MM/DD/YYYY)

Freezer Location \_\_\_\_\_

Comments \_\_\_\_\_

Urethral Gram Stain  < 5  
 >= 5  
 < 1  
(PMN's/hpf)

Gram Negative Intracellular Diplococci (GNID) Present Urethral Gram Stain  No  
 Yes

Comments for Urethral Gram Stain \_\_\_\_\_

Slide Identifier \_\_\_\_\_

Slide Storage Box \_\_\_\_\_

Any additional comments \_\_\_\_\_

# Cell Count

---

Barcode for SL1/Spent Urethral Swab

\_\_\_\_\_  
(SL1)

---

Barcode for S1/Urethral Swab

\_\_\_\_\_  
(S1)

---

Barcode for U1/Master Urine

\_\_\_\_\_  
(U1)

---

Barcode for Sv/Saliva

\_\_\_\_\_  
(Sv)

---

Barcode for U1c/UnSpun Urine

\_\_\_\_\_  
(U1c)

---

Barcode for P1/Cell Pellet

\_\_\_\_\_  
(P1)

---

Barcode for Sup/Master Supernatant

\_\_\_\_\_  
(Sup)

---

Barcode for Sup1/Filtered Supernatant

\_\_\_\_\_  
(Sup1)

---

Barcode for Sup2/Filtered Supernatant

\_\_\_\_\_  
(Sup2)

---

Barcode for Sup3/Filtered Supernatant

\_\_\_\_\_  
(Sup3)

---

Barcode for Sup4/Filtered Supernatant

\_\_\_\_\_  
(Sup4)

---

Date Form Filled Out

\_\_\_\_\_  
(MM/DD/YYYY)

---

Name of Person Filling Form

- Evelyn Toh  
 Other

---

Please specify other name not listed

\_\_\_\_\_

---

Date received in lab

\_\_\_\_\_

(MM/DD/YYYY)

---

Urine Volume

\_\_\_\_\_

---

Value of Total Cell Count

\_\_\_\_\_

**Urine Cell Count**

---

Date Frozen

\_\_\_\_\_

(MM/DD/YYYY)

---

Freezer Location

\_\_\_\_\_

---

Comments

\_\_\_\_\_

---

Total Cell Count (Neat)

\_\_\_\_\_

---

Total Cell Count (Centrifuged)

\_\_\_\_\_

# IUMP Target Baseline

Name of Person Filling out the Form

Please specify other not listed

\_\_\_\_\_

Target Accruals Group

- IU
- Healthy
- CT only
- IUMP Other NGU Groups
- Enrolled as control, doesn't meet criteria
- Enrolled as case, doesn't meet criteria

**If IUMP other NGU Groups, specify if**

|    | Positive              | Negative              | Indeterminate         | Not Done              |
|----|-----------------------|-----------------------|-----------------------|-----------------------|
| MG | <input type="radio"/> | <input type="radio"/> | <input type="radio"/> | <input type="radio"/> |
| UU | <input type="radio"/> | <input type="radio"/> | <input type="radio"/> | <input type="radio"/> |
| TV | <input type="radio"/> | <input type="radio"/> | <input type="radio"/> | <input type="radio"/> |
| GC | <input type="radio"/> | <input type="radio"/> | <input type="radio"/> | <input type="radio"/> |
| NM | <input type="radio"/> | <input type="radio"/> | <input type="radio"/> | <input type="radio"/> |
| CT | <input type="radio"/> | <input type="radio"/> | <input type="radio"/> | <input type="radio"/> |

Comments

\_\_\_\_\_
